# Supplementary material
Source: PubMed Central journal article supplement (PMC5646703)
Supplement: NIHMS875160-supplement-10826_2017_741_MOESM2_ESM.pdf [file NIHMS875160-supplement-10826_2017_741_MOESM2_ESM.pdf]

# Multidimensional Assessment of Parenting Scale (MAPS)

## Parent Version

|                                    |                                         |                 |
|------------------------------------|-----------------------------------------|-----------------|
| <b>Child's Name/ID</b> _____       | <b>Child Sex:</b> (Circle One)          | Female / Male   |
| <b>Parent's Name/ID</b> _____      | <b>Child Date of Birth</b> (mm/dd/yyyy) | ___ / ___ / ___ |
| <b>Relationship to Child</b> _____ | <b>Today's Date</b> (mm/dd/yyyy)        | ___ / ___ / ___ |
| <b>Child's Age:</b> _____          | <b>Child's Grade</b>                    | _____           |

### Instructions:

Parents have different ways of trying to raise their children. Please read each statement and rate how much each one best describes your parenting during the **past two months** with the child indicated above.

|                                                                                                         | Never | Almost Never | Sometimes | Often | Always |
|---------------------------------------------------------------------------------------------------------|-------|--------------|-----------|-------|--------|
| 1. I express affection by hugging, kissing, and holding my child.                                       | 1     | 2            | 3         | 4     | 5      |
| 2. If my child whines or complains when I take away a privilege, I will give it back                    | 1     | 2            | 3         | 4     | 5      |
| 3. I am afraid that disciplining my child for misbehavior will cause her/him to not like me.            | 1     | 2            | 3         | 4     | 5      |
| 4. I argue with my child.                                                                               | 1     | 2            | 3         | 4     | 5      |
| 5. I use threats as punishment with little or no justification.                                         | 1     | 2            | 3         | 4     | 5      |
| 6. The punishment I give my child depends on my mood.                                                   | 1     | 2            | 3         | 4     | 5      |
| 7. I have warm and intimate times together with my child.                                               | 1     | 2            | 3         | 4     | 5      |
| 8. I yell or shout when my child misbehaves                                                             | 1     | 2            | 3         | 4     | 5      |
| 9. My child talks me out of punishing him/her after he/she has done something wrong                     | 1     | 2            | 3         | 4     | 5      |
| 10. I show respect for my child's opinions by encouraging him/her to express them.                      | 1     | 2            | 3         | 4     | 5      |
| 11. If my child does his/her chores, I will recognize his/her behavior in some manner.                  | 1     | 2            | 3         | 4     | 5      |
| 12. I let my child out of a punishment early (like lift restrictions earlier than I originally said).   | 1     | 2            | 3         | 4     | 5      |
| 13. I explode in anger toward my child.                                                                 | 1     | 2            | 3         | 4     | 5      |
| 14. I spank my child with my hand when he/she has done something wrong.                                 | 1     | 2            | 3         | 4     | 5      |
| 15. I give reasons for my requests (such as "We must leave in five minutes, so it's time to clean up.") | 1     | 2            | 3         | 4     | 5      |

|                                                                                                                                      | Never | Almost Never | Sometimes | Often | Always |
|--------------------------------------------------------------------------------------------------------------------------------------|-------|--------------|-----------|-------|--------|
| 16. I lose my temper when my child doesn't do something I ask him/her to do.                                                         | 1     | 2            | 3         | 4     | 5      |
| 17. I encourage my child to talk about her/his troubles.                                                                             | 1     | 2            | 3         | 4     | 5      |
| 18. If I give my child a request and she/he carries out the request, I praise her/him for listening and complying.                   | 1     | 2            | 3         | 4     | 5      |
| 19. I warn my child before a change of activity is required (such as a five-minute warning before leaving the house in the morning). | 1     | 2            | 3         | 4     | 5      |
| 20. If my child gets upset when I say "No," I back down and give in to her/him.                                                      | 1     | 2            | 3         | 4     | 5      |
| 21. My child and I hug and/or kiss each other.                                                                                       | 1     | 2            | 3         | 4     | 5      |
| 22. I listen to my child's ideas and opinions.                                                                                       | 1     | 2            | 3         | 4     | 5      |
| 23. I feel that getting my child to obey is more trouble than it's worth.                                                            | 1     | 2            | 3         | 4     | 5      |
| 24. I spank my child when I am extremely angry.                                                                                      | 1     | 2            | 3         | 4     | 5      |
| 25. I use physical punishment as a way of disciplining my child.                                                                     | 1     | 2            | 3         | 4     | 5      |
| 26. If my child cleans his room, I will tell him/her how proud I am.                                                                 | 1     | 2            | 3         | 4     | 5      |
| 27. I give in to my child when she/he causes a commotion about something.                                                            | 1     | 2            | 3         | 4     | 5      |
| 28. I tell my child my expectations regarding behavior before my child engages in an activity.                                       | 1     | 2            | 3         | 4     | 5      |
| 29. When I am upset or under stress, I am picky and on my child's back.                                                              | 1     | 2            | 3         | 4     | 5      |
| 30. I tell my child that I like it when he/she helps out around the house.                                                           | 1     | 2            | 3         | 4     | 5      |
| 31. I use physical punishment (for example, spanking) to discipline my child because other things I have tried have not worked.      | 1     | 2            | 3         | 4     | 5      |
| 32. I provide my child with a brief explanation when I discipline his/her misbehavior.                                               | 1     | 2            | 3         | 4     | 5      |
| 33. I avoid struggles with my child by giving clear choices.                                                                         | 1     | 2            | 3         | 4     | 5      |
| 34. When my child misbehaves, I let him know what will happen if she/he doesn't behave.                                              | 1     | 2            | 3         | 4     | 5      |

## **MAPS scoring**

*Proactive Parenting:* MAPS\_PP=MEAN(MAPS\_15, MAPS\_19, MAPS\_28, MAPS\_32, MAPS\_33, MAPS\_34).

*Positive Reinforcement:* MAPS\_PR=MEAN(MAPS\_11, MAPS\_18, MAPS\_26, MAPS\_30).

*Warmth:* MAPS\_WM=MEAN(MAPS\_1, MAPS\_7, MAPS\_21).

*Supportiveness:* MAPS\_SP=MEAN(MAPS\_10, MAPS\_17, MAPS\_22).

*Hostility:* MAPS\_HS=MEAN(MAPS\_4, MAPS\_5, MAPS\_6, MAPS\_8, MAPS\_13, MAPS\_16, MAPS\_29).

*Lax Control:* MAPS\_LC=MEAN(MAPS\_2, MAPS\_3, MAPS\_9, MAPS\_12, MAPS\_20, MAPS\_23, MAPS\_27).

*Physical Control:* MAPS\_PC=MEAN(MAPS\_14, MAPS\_24, MAPS\_25, MAPS\_31).

*Broadband Positive Parenting:* MAPS\_POS=MEAN(MAPS\_PP, MAPS\_PR, MAPS\_WM, MAPS\_SP).

*Broadband Negative Parenting:* MAPS\_NEG=MEAN(MAPS\_HS, MAPS\_LC, MAPS\_PC).
